# Supplementary material
Source: PubMed Central journal article supplement (PMC8092608)
Supplement: pnas.2019474118.sapp.pdf [file pnas.2019474118.sapp.pdf]

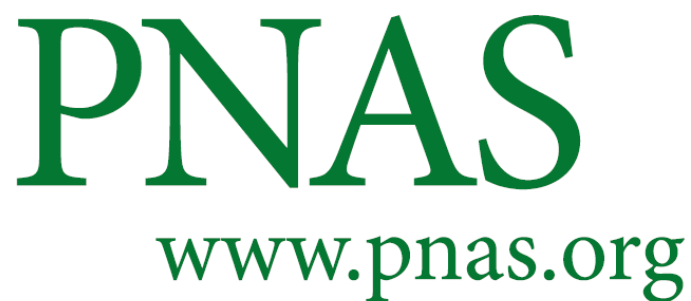

Supplementary Information for

**Distinct Signaling by Insulin and IGF-1 Receptors and Their Extra-and Intra-Cellular  
Domains**

Hirofumi Nagao, Weikang Cai, Nicolai J. Wewer Albrechtsen, Martin Steger, Thiago M. Batista,  
Hui Pan, Jonathan M. Dreyfuss, Matthias Mann and C. Ronald Kahn\*

Corresponding author: C. Ronald Kahn

Email: [c.ronald.kahn@joslin.harvard.edu](mailto:c.ronald.kahn@joslin.harvard.edu)

**This PDF file includes:**

Supplementary Figures S1 to S8

Supplementary Table S1

**Other supplementary materials for this manuscript include the following:**

Supplementary Spreadsheet: Unlogged\_data of all samples

SI Methods and references

# Supplementary Figures

## Fig. S1

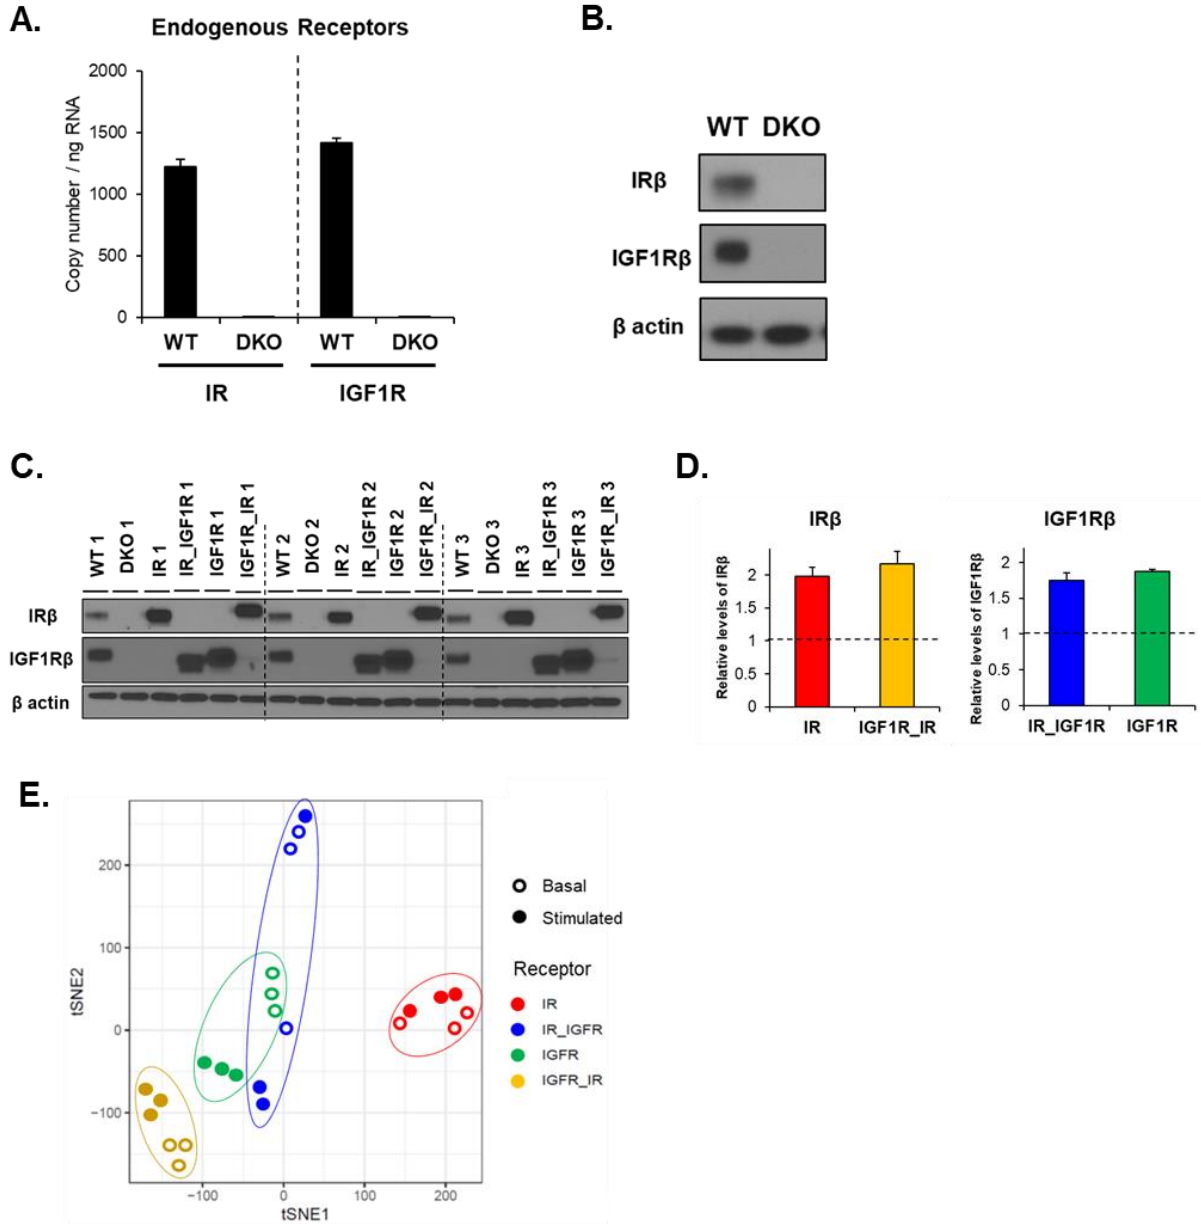

**Fig. S1. The Expression of Endogenous IR and IGF1R, and the t-SNE Plots of the Global Phosphoproteomics.**

**(A)** The mRNA levels of endogenous IR and IGF1R from wild-type and DKO brown preadipocytes as determined by qPCR using cDNA standards for quantification. Data are means  $\pm$  SEM copy number per ng total RNA, n = 3. **(B)** Immunoblotting of IR and IGF1R using antibodies specific for IR $\beta$  and IGF1R $\beta$  in lysates from wild-type and DKO cells. **(C and D)** Immunoblot analysis of WT cells, DKO cells and three biological replicates of IR, IR\_IGF1R, IGF1R and IGF1R\_IR cells for IR $\beta$ , IGF1R $\beta$  and  $\beta$ -actin **(C)** and quantification of IR $\beta$  and IGF1R $\beta$  **(D)**. The level of each protein in WT cells was set at 1. Data are means  $\pm$  SEM (n = 3 per group). **(E)** T-distributed Stochastic Neighbor Embedding (t-SNE) of the phosphosites identified by LC-MS/MS of DKO preadipocytes reconstituted with IR, IGF1R, and chimeric receptors IR\_IGF1R and IGF1R\_IR cells in the basal and hormone stimulated states.

Fig. S2

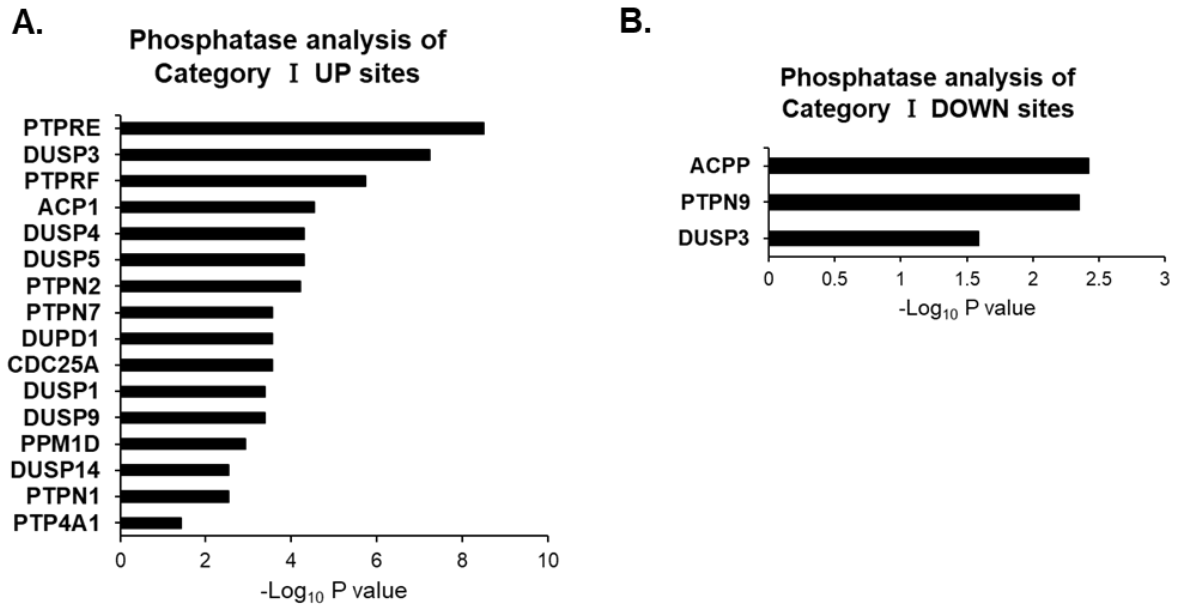

**Fig. S2. Phosphatase enrichment analysis for phosphosites in Category I.**

(A and B) Phosphatase enrichment analysis for phosphosites in Category IA (A) and Category IB (B) by using DEPOD (human DEPhOsphorylation Database). Plots are  $-\log_{10}$  transforms of enrichment P value.

**Fig. S3**

**A.**

**Category II IR > IGF1R sites**

**Membrane Trafficking**

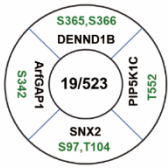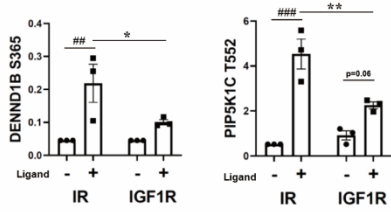

**Rho GTPase**

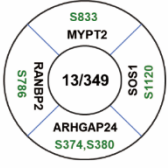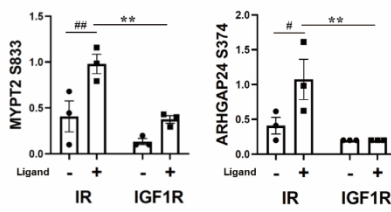

**C.**

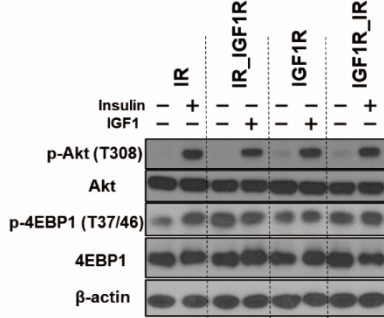

**D.**

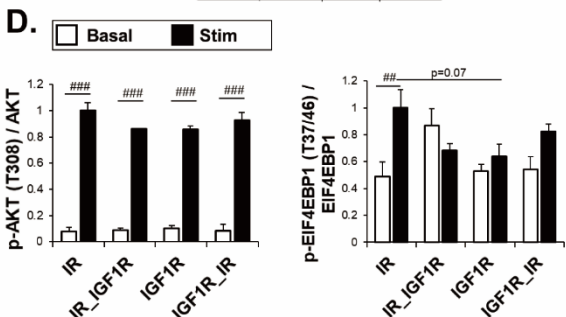

**H.**

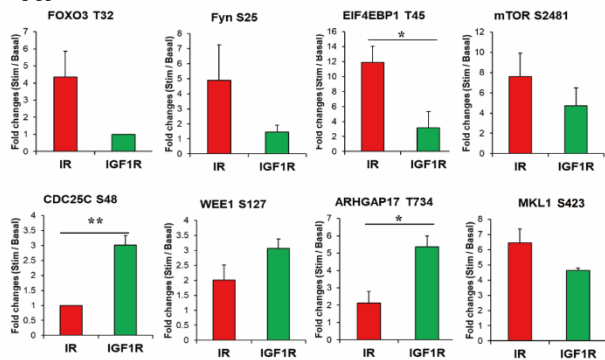

**B.**

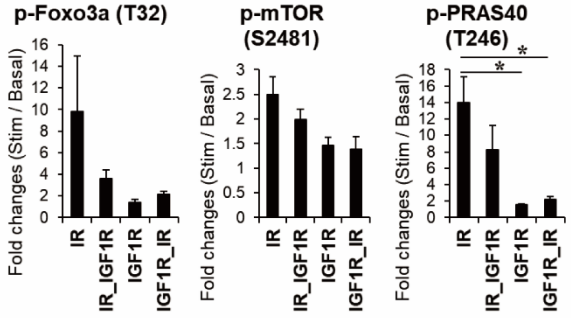

**E.**

**Phosphatase analysis of Category II IR > IGF1R sites**

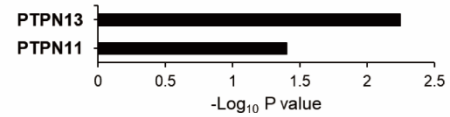

**F.**

**Category II IGF1R > IR sites**

**Cell Cycle Checkpoints**

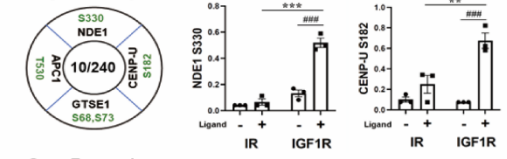

**Gene Expression**

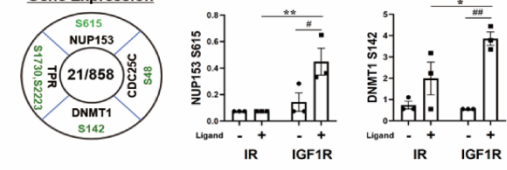

**G.**

**Phosphatase analysis of Category II IGF1R > IR sites**

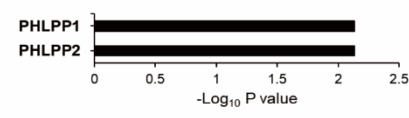

**I.**

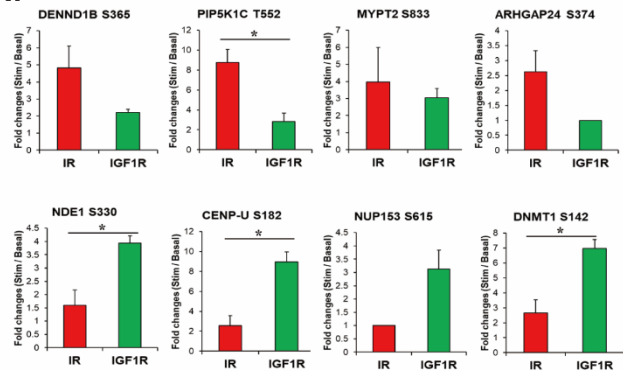

**Fig. S3. Differential phosphorylated patterns by IR and IGF1R in the ligand action.**

**(A)** Representation of some important phosphosites in selected pathways, and quantification of exemplary phosphosites in the cluster of Category IIA. Numbers in the center of each circle indicate number of proteins regulated within each pathway. Data are means  $\pm$  SEM of phosphosites intensity values. #  $P < 0.05$ , ##  $P < 0.01$ , ###  $P < 0.001$  basal vs ligand, \*  $P < 0.05$ , \*\*  $P < 0.01$  IR vs IGF1R, Two-way ANOVA. **(B)** The densitometric analysis of stimulated level divided by basal level in phosphorylated proteins in Figure 3D. Data are means  $\pm$  SEM (n = 3 per group). \*  $P < 0.05$ , One-way ANOVA. **(C and D)** Validation of phosphoproteomics by immunoblot in lysates from IR, IR\_IGF1R, IGF1R and IGF1R\_IR cells. Representative immunoblot analysis **(C)** and quantification of p-Akt<sup>T308</sup> and p-4EBP1<sup>T37/46</sup> **(D)**. The level of each protein in stimulated-IR was set at 1. Data are means  $\pm$  SEM (n = 3 per group). ##  $P < 0.01$ , ###  $P < 0.001$  basal vs ligand, Two-way ANOVA. **(E)** Phosphatase enrichment analysis for phosphosites in Category IIA. **(F)** Representation of some important phosphosites in selected pathways, and quantification of exemplary phosphosites in the cluster of Category IIB. Data are means  $\pm$  SEM of phosphosites intensity values. #  $P < 0.05$  ##  $P < 0.01$  ###  $P < 0.001$  basal vs ligand, \*  $P < 0.05$ , \*\*  $P < 0.01$ , \*\*\*  $P < 0.001$  IR vs IGF1R, Two-way ANOVA. **(G)** Phosphatase enrichment analysis for phosphosites in Category IIB. **(H)** Analysis of the stimulated level of phosphorylation divided by basal level in phosphorylation for selected proteins in Figure 3B and G. **(I)** Analysis of stimulated level of phosphorylation divided by basal level of phosphorylation for proteins in Figure S3A and F. Data are means  $\pm$  SEM (n = 3 per group). \*  $P < 0.05$ , \*\*  $P < 0.01$ , One-way ANOVA.

**Fig. S4**

**A.**

**Category III IGF1R > IR sites**

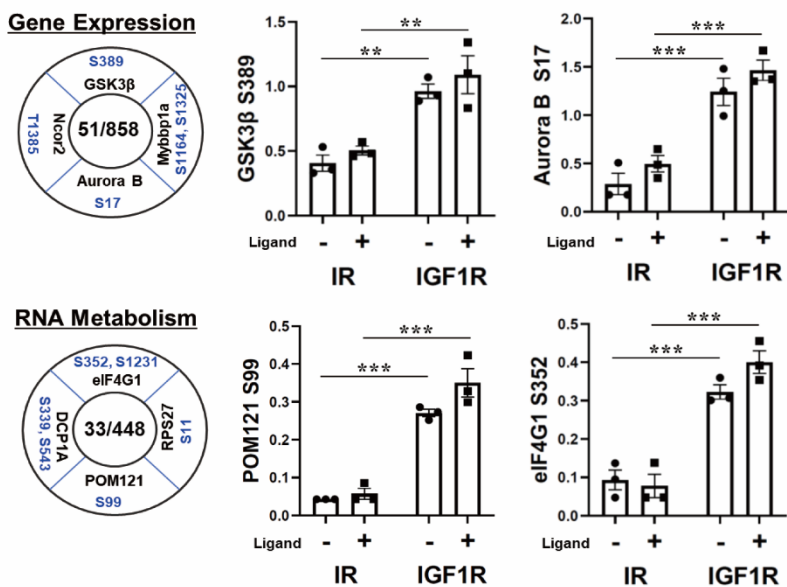

**B.**

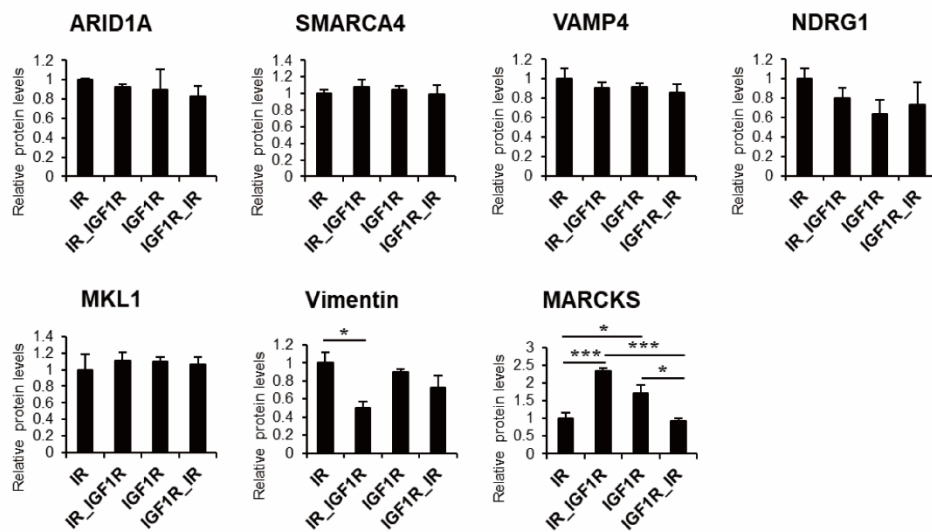

**C.**

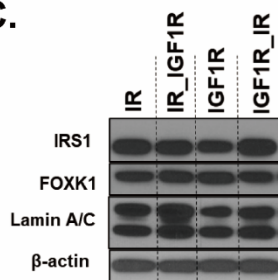

**D.**

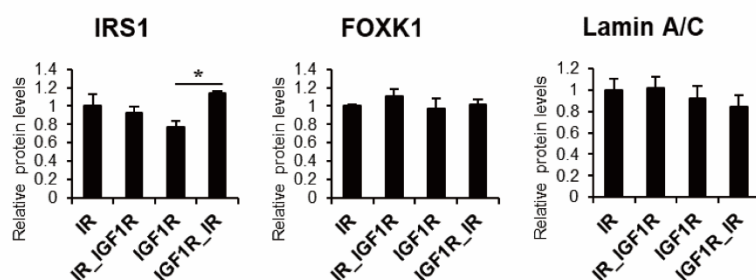

**Fig. S4. Differential phosphorylated patterns by IR and IGF1R in the basal state.**

**(A)** Representation of some important phosphosites in selected pathways, and quantification of exemplary phosphosites in the cluster of Category IIIB. Data are means  $\pm$  SEM of phosphosites intensity values. \*\*  $P < 0.01$ , \*\*\*  $P < 0.001$  IR vs IGF1R, Two-way ANOVA. **(B)** Densitometric analysis of total proteins in Fig. 5h in lysates from IR, IR\_IGF1R, IGF1R and IGF1R\_IR cells. The level of each protein in IR was set at 1. Data are means  $\pm$  SEM (n = 3 per group). \*  $P < 0.05$  \*\*\*  $P < 0.001$ , One-way ANOVA. **(C and D)** Immunoblotting of total protein levels for IRS1, FOXK1 and Lamin A/C in lysates from cells expressing IR, IR\_IGF1R, IGF1R and IGF1R\_IR. Representative immunoblot analysis **(C)** and quantification of IRS1, FOXK1 and Lamin A/C **(D)**. The level of each protein in IR was set at 1. Data are means  $\pm$  SEM (n = 3 per group). \*  $P < 0.05$ , One-way ANOVA.



Fig. S5

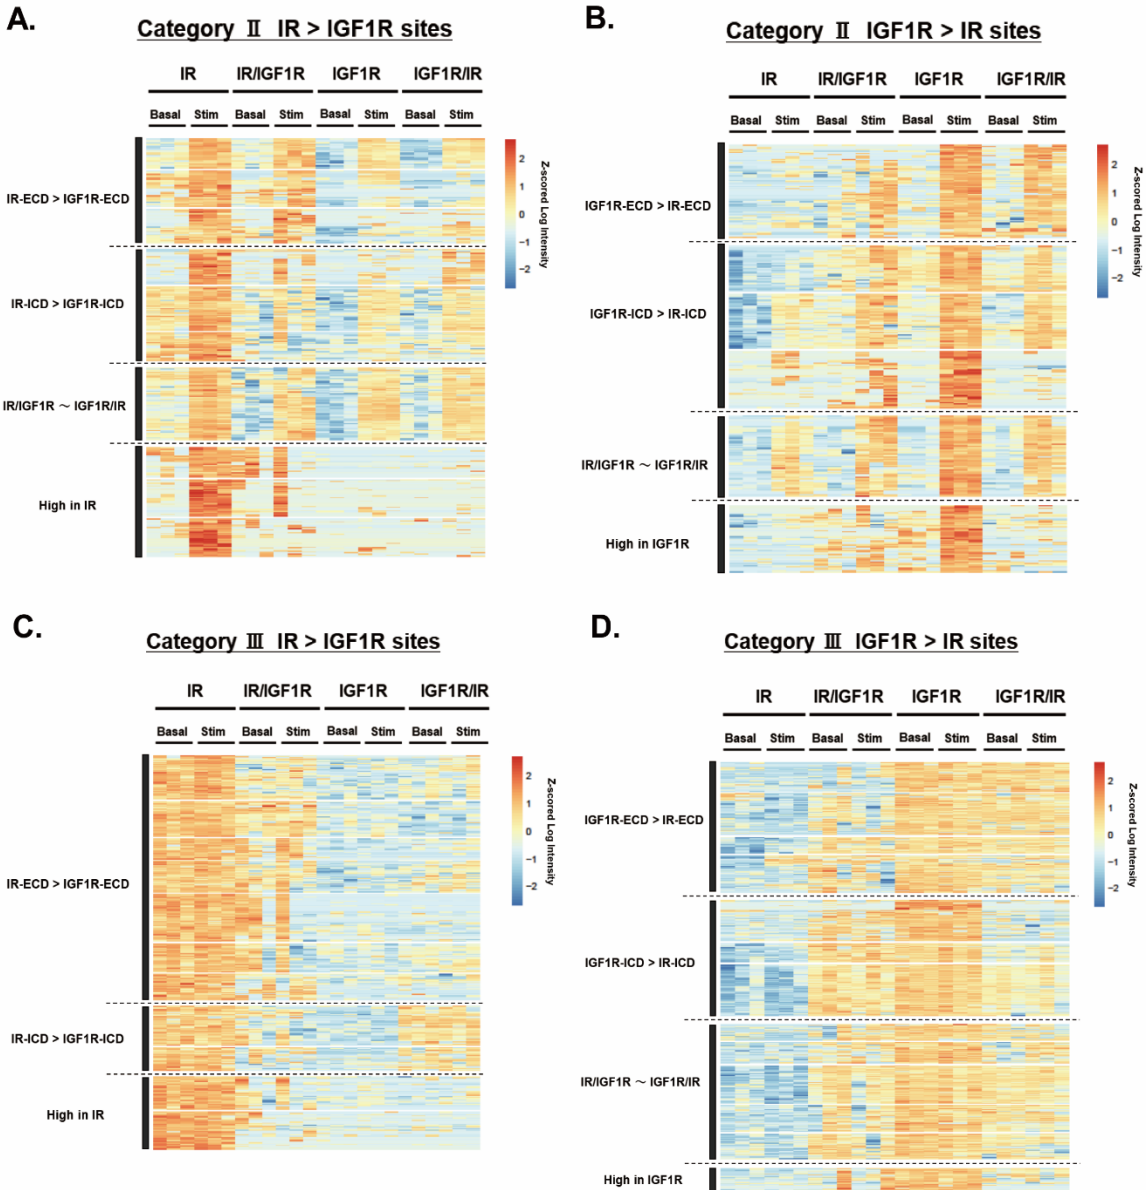

**Fig. S5. Domain-dependent effects of IR and IGF1R in the ligand action.**

(A-D) A hierarchical clustering map showing sites that were differential between IR vs IGF1R (Fig. 2A) to which has been added the phosphoproteomic data of cells expressing chimeric IR\_IGF1R and IGF1R\_IR receptors. Then, the cluster of Category IIA (A), the cluster of Category IIB (B), the cluster of Category IIIA (C) and the cluster of Category IIIB (D) were subclassified to identify the domain-dependency of these phosphosites (FDR < 0.05). Values are Z-scores of log<sub>2</sub> transformed intensity values.

**Fig. S6**

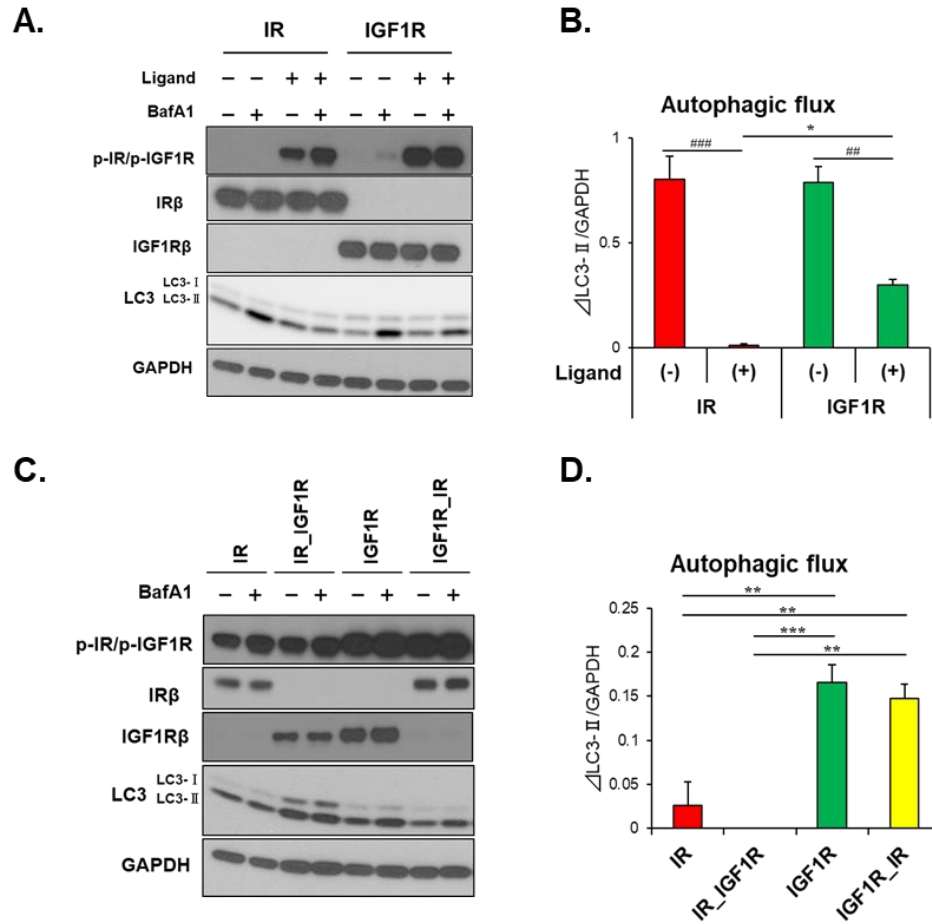

**Fig. S6. Changes in autophagic flux in IR, IGF1R and chimeric receptors IR\_IGF1R and IGF1R\_IR.** (A and B) IR and IGF1R cells were cultured for 2 h in FBS- medium with or without 100  $\mu$ M ligand (insulin for IR and IGF-1 for IGF1R) and 125 nM bafilomycin A1 (BafA1 after 4 h FBS starvation, and then analyzed autophagic flux by immunoblot using anti-LC3 and anti-GAPDH antibodies. Representative western blot analysis for p-IR $\beta$ /p-IGF1R $\beta$ , IR $\beta$ , IGF1R $\beta$ , LC3 and GAPDH (A) and quantitative analysis of autophagic flux as measured by  $\Delta$ LC3-II with or without BafA1 (B) (n = 3 per group). ## P < 0.01, ### P < 0.001 basal vs ligand, \* P < 0.05 IR vs IGF1R, Two-way ANOVA. (C and D) IR, IGF1R and chimeric receptors IR\_IGF1R and IGF1R\_IR cells were cultured for 2 h in FBS-medium with 100  $\mu$ M ligand (insulin for IR and IR\_IGF1R, and IGF-1 for IGF1R and IGF1R\_IR) and with or without 125 nM Baf.A1 after 4 h FBS starvation, and then analyzed autophagic flux by immunoblot using anti-LC3 and anti-GAPDH antibodies. Representative western blot analysis for p-IR $\beta$ /p-IGF1R $\beta$ , IR $\beta$ , IGF1R $\beta$ , LC3 and GAPDH (C) and quantitative analysis of autophagic flux as measured by  $\Delta$ LC3-II with or without BafA1 (D) (n = 3 per group). \*\* P < 0.01, \*\*\* P < 0.001, One-way ANOVA.

Fig. S7

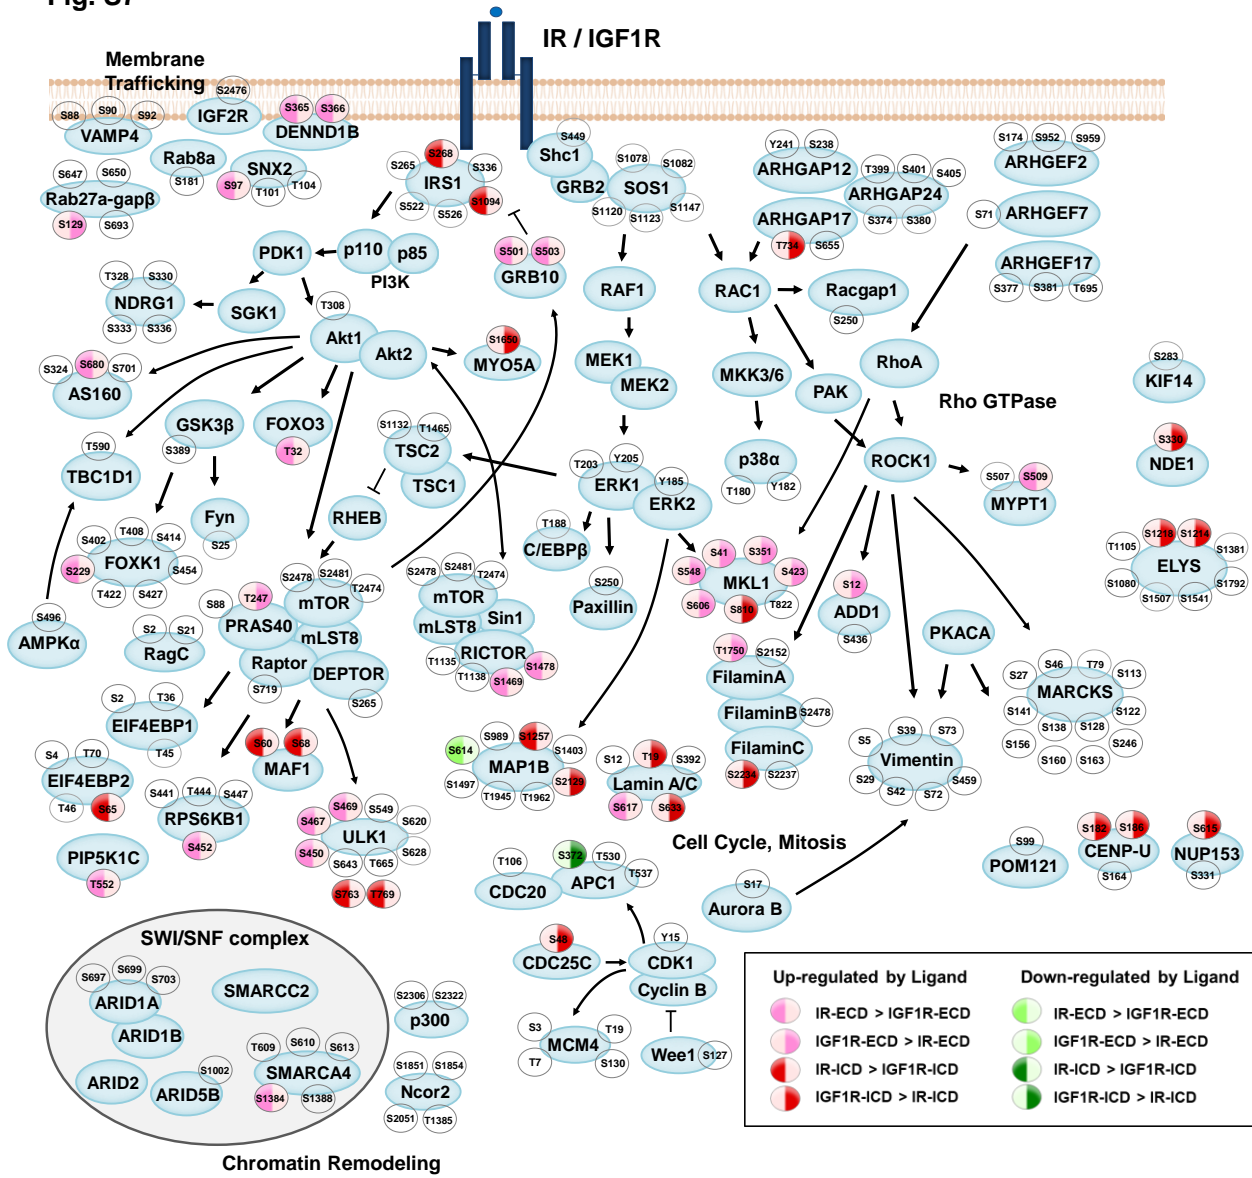

**Fig. S7. An integrated phosphorylation map of domain-dependent effects by IR and IGF1R in the stimulated state.**

Signaling map showing phosphosites regulated by ligand for IR, IGF1R and chimeric receptors IR\_IGF1R and IGF1R\_IR identified by phosphoproteomics. Each of the phosphosite indicated was analyzed by Two-way ANOVA ( $P < 0.05$ ). Red-filled circles represent sites for which phosphorylation was increased and green-filled circles sites for which phosphorylation was decreased by ligand. Sites with light red or light green only on left represent sites regulated by IR-ECD greater than IGF1R-ECD. Sites with light red or light green fill only on right represent sites for which regulation was greater by IGF1R-ECD than IR-ECD. Sites with dark red or dark green only on left represent sites regulated by IR-ICD greater than IGF1R-ICD. Sites with dark red or dark green fill only on right represent sites for which regulation was greater by IGF1R-ICD than IR-ICD. Arrows indicate known protein-protein interactions and phosphorylation/dephosphorylation events curated from databases of experimentally defined kinase-substrate relationships (PhosphositePlus) and the literature.

Fig. S8

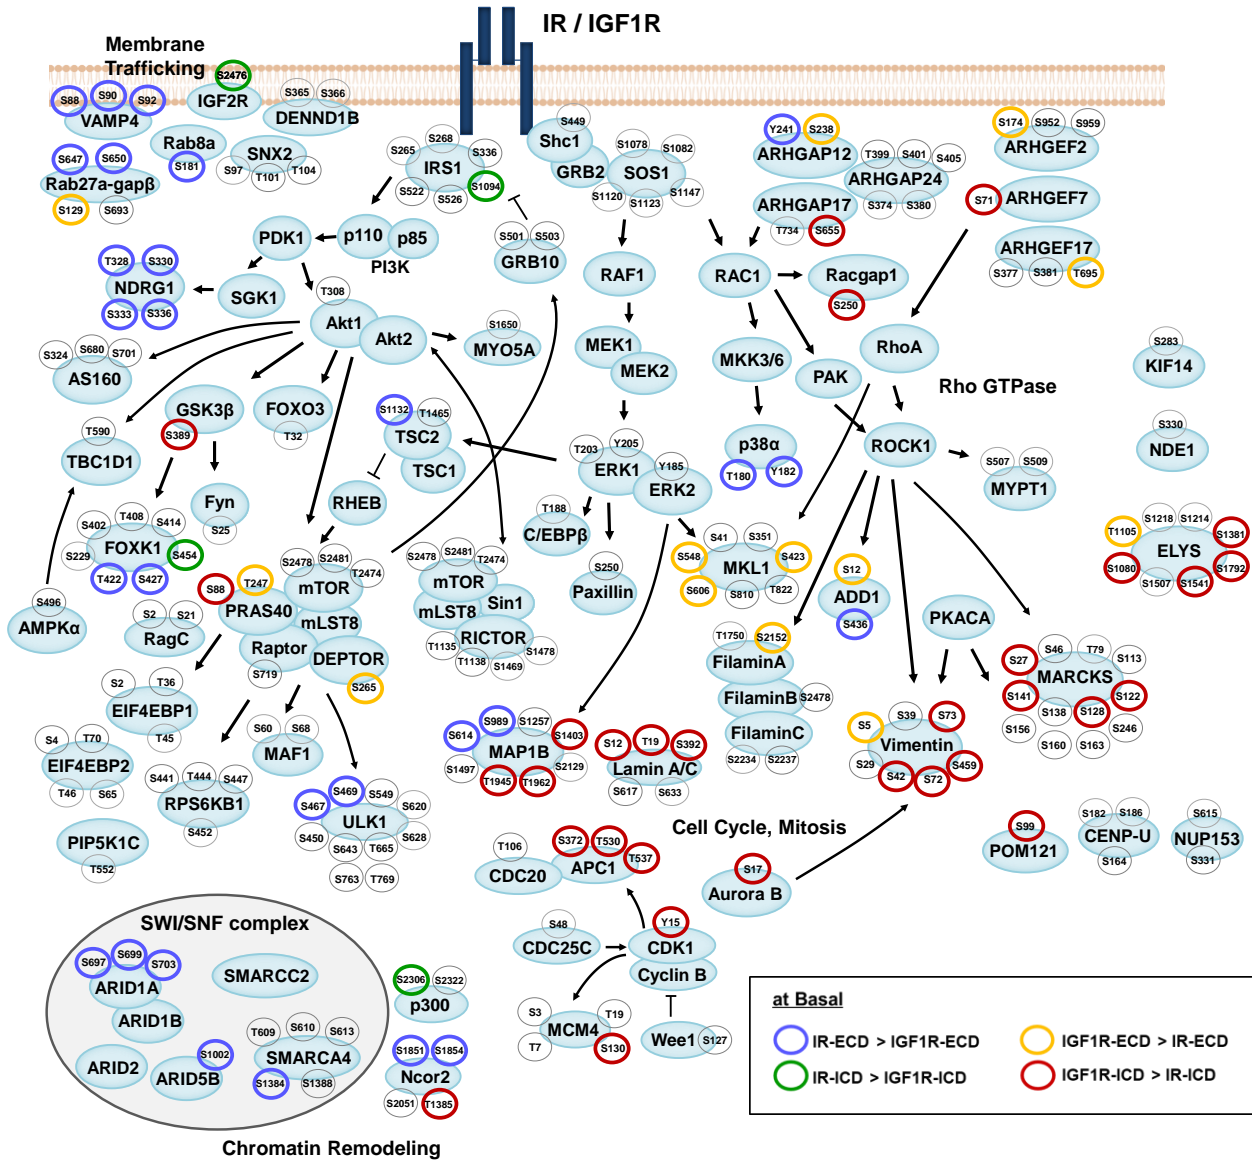

**Fig. S8. An integrated phosphorylation map of domain-dependent effects by IR and IGF1R in the basal state.**

Signaling cascade map regulated by IR, IGF1R and chimeric receptors IR\_IGF1R and IGF1R\_IR in the basal state identified by phosphoproteomics. Each of the phosphosite indicated was analyzed by Two-way ANOVA ( $P < 0.05$ ). Blue and green halos represent increased phosphorylation in IR-ECD and IR-ICD in the basal (non-stimulated) state, respectively. Yellow and red halos represent increased phosphorylation in IGF1R-ECD and IGF1R-ICD in the basal state, respectively. Arrows indicate known protein-protein interactions and phosphorylation/dephosphorylation events curated from databases of experimentally defined kinase-substrate relationships (PhosphositePlus) and the literature.

## Supplementary Table S1.

The enriched pathways and kinases of all the categories in the heatmap (Fig. 2A).

| Category | Description of Cluster       | Phospho sites | Proteins | Enriched Reactome Pathways (Top 10)                  | FDR      | Enriched Kinases (Top 10)                      | P-value                                                     |
|----------|------------------------------|---------------|----------|------------------------------------------------------|----------|------------------------------------------------|-------------------------------------------------------------|
| IA       | UP by Ligand                 | 446           | 249      | Signaling by NTRK1 (TRKA)                            | 7.88E-07 | P38B                                           | 3.18E-08                                                    |
|          |                              |               |          | MAPK targets/ Nuclear events mediated by MAP kinases | 1.18E-05 | JNK1                                           | 4.14E-08                                                    |
|          |                              |               |          | Gastrin-CREB signalling pathway via PKC and MAPK     | 1.18E-05 | P38A                                           | 0.0000133                                                   |
|          |                              |               |          | Signaling by Rho GTPases                             | 2.12E-05 | ERK1                                           | 0.0000503                                                   |
|          |                              |               |          | Signal attenuation                                   | 2.12E-05 | P70S6KB                                        | 0.0000509                                                   |
|          |                              |               |          | ERK/MAPK targets                                     | 2.21E-05 | MEK1                                           | 0.0000509                                                   |
|          |                              |               |          | Axon guidance                                        | 2.21E-05 | PDK1                                           | 0.000101                                                    |
|          |                              |               |          | Signaling by Receptor Tyrosine Kinases               | 2.21E-05 | P70S6K                                         | 0.000777                                                    |
|          |                              |               |          | Cell Cycle                                           | 8.08E-05 | PLK3                                           | 0.000895                                                    |
|          |                              |               |          | Toll Like Receptor 3 (TLR3) Cascade                  | 8.08E-05 | P38G                                           | 0.000895                                                    |
| IB       | DOWN by Ligand               | 200           | 126      | None detected                                        |          | PKCT                                           | 0.0459                                                      |
| IIA      | UP by Ligand:<br>IR > IGF1R  | 489           | 274      | mTORC1-mediated signalling                           | 0.0066   | mTOR                                           | 0.00028                                                     |
|          |                              |               |          | DCC mediated attractive signaling                    | 0.0066   |                                                |                                                             |
|          |                              |               |          | Membrane Trafficking                                 | 0.0069   |                                                |                                                             |
|          |                              |               |          | PIP3 activates AKT signaling                         | 0.0251   |                                                |                                                             |
|          |                              |               |          | Signaling by Rho GTPases                             | 0.033    |                                                |                                                             |
|          |                              |               |          | VEGFA-VEGFR2 Pathway                                 | 0.0465   |                                                |                                                             |
| IIB      | UP by Ligand:<br>IGF1R > IR  | 340           | 248      | Cell Cycle, Mitotic                                  | 2.05E-05 | ERK2<br>AKT2                                   | 1.64E-09<br>0.0393                                          |
|          |                              |               |          | M Phase                                              | 0.0033   |                                                |                                                             |
|          |                              |               |          | Signaling by Rho GTPases                             | 0.0067   |                                                |                                                             |
|          |                              |               |          | Mitotic Spindle Checkpoint                           | 0.0183   |                                                |                                                             |
|          |                              |               |          | Cell Cycle Checkpoints                               | 0.0356   |                                                |                                                             |
|          |                              |               |          | RHO GTPase Effectors                                 | 0.0356   |                                                |                                                             |
|          |                              |               |          | Gene expression (Transcription)                      | 0.0467   |                                                |                                                             |
|          |                              |               |          | G2/M Transition                                      | 0.0467   |                                                |                                                             |
|          |                              |               |          | Mitotic Prometaphase                                 | 0.0467   |                                                |                                                             |
|          |                              |               |          | Signaling by MET                                     | 0.0467   |                                                |                                                             |
| IIIA     | Altered Basal:<br>IR > IGF1R | 636           | 280      | Membrane Trafficking                                 | 0.0312   | SGK1                                           | 0.00862                                                     |
|          |                              |               |          | Chromatin modifying enzymes                          | 0.0312   |                                                |                                                             |
| IIIB     | Altered Basal:<br>IGF1R > IR | 798           | 497      | Cell Cycle                                           | 1.39E-11 | CDK1<br>PKACA<br>PKCT<br>AURB<br>CK2A1<br>ERK2 | 0.000726<br>0.00699<br>0.0133<br>0.0183<br>0.0301<br>0.0477 |
|          |                              |               |          | Cell Cycle, Mitotic                                  | 1.39E-10 |                                                |                                                             |
|          |                              |               |          | M Phase                                              | 5.20E-10 |                                                |                                                             |
|          |                              |               |          | Signaling by Rho GTPases                             | 9.76E-10 |                                                |                                                             |
|          |                              |               |          | Gene expression (Transcription)                      | 1.28E-07 |                                                |                                                             |
|          |                              |               |          | Metabolism of RNA                                    | 1.00E-06 |                                                |                                                             |
|          |                              |               |          | Cell Cycle Checkpoints                               | 2.01E-06 |                                                |                                                             |
|          |                              |               |          | Mitotic Spindle Checkpoint                           | 3.07E-06 |                                                |                                                             |
|          |                              |               |          | RHO GTPase Effectors                                 | 5.66E-06 |                                                |                                                             |
|          |                              |               |          | Mitotic Prometaphase                                 | 5.66E-06 |                                                |                                                             |
| IV       | Complex Regulation           | 299           | 169      |                                                      |          |                                                |                                                             |

## SI Methods

### Materials

Antibodies against phospho-IR/IGF-1R (#3024), IR $\beta$  (#3025), IGF1R $\beta$  (#3027),  $\beta$ -actin (#4970), p-AKT<sup>S308</sup> (#4056), AKT pan (#4685), p-FOXO1<sup>T24</sup>/FOXO3a<sup>T32</sup> (#9464), FOXO3a (#2497), p-mTOR<sup>S2481</sup> (#2974), mTOR (#2972), p-4EBP1<sup>T37, T46</sup> (#2855), 4EBP1 (#9452), p-PRAS40<sup>T246</sup> (#13175), PRAS40 (#2691), MKL1 (#14760), NDRG1 (#5196), Vimentin (#5741), Lamin A/C (#2032), FOXK1 (#12025), ARID1A (#12354), SMARCA4 (#3508), LC3A/B (#12741) and GAPDH (#5174) were purchased from Cell Signaling. Anti-MARCKS antibody (sc-100777) was purchased from Santa Cruz. Anti-Phospho-IRS-1 (Y608) antibody (#09-432) and Anti-IRS-1 antibody (#06-248) were purchased from Millipore. Anti-VAMP4 antibody (#PA1-768) was purchased from Invitrogen. Human insulin was purchased from Sigma and human IGF-1 from Preprotech. Plasmids of IR, IGF1R, and chimeric IR\_IGF1R and IGF1R\_IR were generated as described previously (1). Briefly, mouse IR (MC224356) and IGF1R (MC224342) cDNA clones were purchased from Origene. Normal wild-type IR, IGF1R, chimeric receptors IR\_IGF1R (IR extracellular domain (a.a. 1 - 919) fused to IGF1R transmembrane and intracellular domain (a.a. 908 - 1339), numbers excluding signal peptide) and IGF1R\_IR (IGF1R extracellular domain (a.a. 1 - 907) fused to IR transmembrane and intracellular domain (a.a. 920 - 1345)) were subcloned into pBabe-hygro empty vector. To generate chimeric receptors, an Ile947 to Leu point mutation was introduced into insulin receptor to generate a BclI restriction site using primer pair (5'-ccatcaaattattgccaactgatcattggaccctcatc-3'; IR BclI 3: 5'-gatgaggggtccaatgatcagtttgcaatattgatgg-3').

### Brown preadipocytes isolation and culture



IR/IGF1R double knockout brown preadipocytes were obtained as previously described (2). Briefly, preadipocytes were isolated from newborn homozygous IR-lox/IGF1R-lox mice by collagenase digestion of the brown fat pad and immortalized by infection with retrovirus encoding SV40 T-antigen followed by the selection with 2 µg/ml of puromycin. The immortalized preadipocytes were infected with adenovirus expressing GFP alone (to generate control cell lines) or GFP-tagged Cre recombinase (to generate double knockout [DKO] cell lines). GFP-positive cells were sorted and expanded in Dulbecco's Modified Eagle Medium (DMEM) supplemented with 10% heat-inactivated fetal bovine serum (FBS, Atlas Biologicals), 100 U/ml penicillin and 100 µg/ml streptomycin (Gibco) at 37 °C in a 5% CO<sub>2</sub> incubator. IR/IGF1R double knock-out preadipocytes were then stably transduced with pBabe retrovirus encoding mouse IR, IGF1R and chimeric receptor IR\_IGF1R and IGF1R\_IR. Plates (10 cm) of HEK-293T cells were transiently transfected with 10 µg of pBabe-hygro retroviral expression vectors encoding wild-type or mutant IR or IGF1R sequences and viral packaging vectors SV-E-MLV-env and SV-E-MLV using TransITExpress transfection reagent (Mirus Bio Corp.). 48 h after transfection, virus-containing medium was collected and passed through a 0.45 µm pore size syringe filter. Filter-sterilized Polybrene (hexadimethrine bromide; 12 µg/ml) was added to the virus-loaded medium. This medium was then applied to proliferating (40% confluent) DKO cells. 24 h after infection, cells were treated with trypsin and replated in a medium supplemented with hygromycin (Invitrogen) as a selection antibiotic. Cells were maintained in DMEM with 4.5 g/liter glucose supplemented with 10% FBS, 100 U/ml penicillin and 100 µg/ml streptomycin (Gibco) and cultured at 37°C in a humidified atmosphere of 5% CO<sub>2</sub>. All animal studies were approved by the Institutional Animal Care and Use Committee (IACUC) at the Joslin Diabetes Center and were in accordance with the National Institutes of Health guidelines.

## **Immunoblotting**

After transfer, polyvinylidene difluoride (PVDF) membranes were blocked in Starting Block T20 solution (Fisher) at room temperature for 1 h, washed 3 times with 1X PBST, and incubated with an appropriate dilution of the primary antibody in Starting Block T20 solution overnight at 4°C. The immunoblots were then washed three times with 1X PBS with Tween-20 (PBST) and incubation with an appropriate dilution of horseradish peroxidase (HRP)-conjugated secondary antibody in Starting Block T20 solution was conducted for additional 1 h. The signals were detected by Immobilon Western Chemiluminescent HRP Substrate (Millipore).

## **Lysis and digestion for phosphoproteomic analysis**

For phosphoproteomics, samples were processed as described previously (3, 4). Briefly, cells were seeded so that they were confluent and could be studied at the same time. The confluent cells were washed twice with ice cold PBS, lysed immediately in SDC buffer (4% SDC, 100 mM Tris pH8.5) and snap frozen. Then, the samples were boiled at 95°C for 5 minutes, sonicated for 20 cycles in Biorupter Plus (Diagenode) and then vortexed for 10 seconds. For each sample, 750 µg of protein lysate was alkylated with 10 mM chloroacetamide and reduced with 40 mM tris(2-carboxyethyl)phosphine by incubating for 20 minutes on ice in dark. The samples were then digested with a mixture of LysC protease and trypsin (1:100 ratio) and incubated overnight at 37°C in a ThermoMixer at 1200 rpm.

## **Phosphopeptide enrichment and LC-MS/MS measurement**

Phosphopeptide enrichment was processed as described previously (4). Briefly, 750 µl acetonitrile (ACN) and 250µl TK buffer (36% trifluoroacetic acid (TFA) & 3 mM KH<sub>2</sub>PO<sub>4</sub>) were added to

the digested peptides, and the samples mixed in a ThermoMixer for 30 seconds at 1,500 rpm. Debris was cleared by centrifugation at 13,000 rpm for 15 min, and the supernatant transferred to 2 ml Deep Well Plates (Eppendorf). TiO<sub>2</sub> beads (prepared in 80% ACN, 6% TFA buffer) were added (1:10 ratio protein/beads) and incubated in a ThermoMixer at 40°C and 2000 rpm for 5 min. The TiO<sub>2</sub> bound phosphopeptides were then pelleted by centrifugation, transferred to clean tubes and washed 4 times in wash buffer (60% ACN, 1% TFA) to remove nonspecific or non-phosphorylated peptides. The beads were suspended in transfer buffer (80% ACN, 0.5% acetic acid) and transferred on top of single layer C8 Stage Tips and centrifuged until dry. The phosphopeptides were eluted with elution buffer (40% ACN, 20% NH<sub>4</sub>OH) and concentrated in a SpeedVac for 20 minutes at 45° C. The phosphopeptides were then acidified by addition of 100µl of 1%TFA and loaded on to equilibrated SDBRPS (styrene-divinylbenzene–reversed phase sulfonated, 3M Empore) Stage Tips. The phosphopeptides containing SDBRPS StageTips were washed once in isopropanol/1% TFA and twice with 0.2% TFA. Finally, the desalted phosphopeptides were eluted with 60µl of elution buffer (80% ACN, 1.25% NH<sub>4</sub>OH). The dried elutes were resuspended in MS loading buffer (3%ACN, 0.3% TFA) and stored at -80°C until LC-MS/MS measurement. LC-MS/MS measurement was performed using Q Exactive HF-X Hybrid Quadrupole-Orbitrap Mass Spectrometer (Thermo Fischer Scientific) coupled online to a nanoflow EASY-nLC1200 HPLC (Thermo Fisher Scientific) as described previously (4).

### **Phosphoproteomic data analysis**

Phosphoproteomic data analysis was processed as described previously (4). The raw files were processed using Maxquant (5) software environment (version 1.5.5.2) with the built in Andromeda search engine for identification and quantification of phosphopeptides. The data were searched

using a target-decoy approach with a reverse database against Uniprot Human reference proteome fasta file with a false discovery rate of 1% at the level of proteins, peptides and modifications using minor changes to the default settings as follows: oxidized methionine, acetylation (protein N-term) and phospho was selected as variable modifications, and carbamidomethyl as fixed modification. A maximum of 2 missed cleavages were allowed, a minimum peptide length of seven amino acids and enzyme specificity was set to trypsin. The Maxquant output phospho table was processed using Perseus (version 1.5.2.11) software suite. For analysis of only the wild-type receptors, phosphopeptides that have at least two valid values were selected, and their missing values were imputed with half of the minimum value of the corresponding phosphopeptide. For analysis of the wild-type and chimeric receptor together, phosphopeptides that have at least 50% valid values were selected, and their missing values were imputed using a random forest algorithm in the R package missForest. All values were further normalized to make all samples have the same median log intensity. The statistical significance of phosphopeptides was assessed with empirical Bayesian linear modeling using the limma package (6). P-values were corrected using the Benjamini-Hochberg false discovery rate (FDR). Differences were considered significant when the FDR was  $<0.05$ . The top phosphosites that have  $FDR < 0.05$  in the F-tests were selected, then hierarchical cluster analysis was performed based on the Euclidean distance of these selected phosphosites. Gene sets based on canonical pathways (7) and human kinase substrates (PhosphositePlus and RegPhos) (8) were tested for enrichment analysis using the Fisher exact test. Heatmaps were created with the pheatmap R package.

## SI References

1. W. Cai *et al.*, Domain-dependent effects of insulin and IGF-1 receptors on signalling and gene expression. *Nat Commun* **8**, 14892 (2017).
2. J. Boucher *et al.*, A kinase-independent role for unoccupied insulin and IGF-1 receptors in the control of apoptosis. *Sci Signal* **3**, ra87 (2010).
3. S. J. Humphrey, S. B. Azimifar, M. Mann, High-throughput phosphoproteomics reveals in vivo insulin signaling dynamics. *Nat Biotechnol* **33**, 990-995 (2015).
4. T. M. Batista *et al.*, A Cell-Autonomous Signature of Dysregulated Protein Phosphorylation Underlies Muscle Insulin Resistance in Type 2 Diabetes. *Cell Metab* **32**, 844-859.e5 (2020).
5. J. Cox, M. Mann, MaxQuant enables high peptide identification rates, individualized p.p.b.-range mass accuracies and proteome-wide protein quantification. *Nat Biotechnol* **26**, 1367-1372 (2008).
6. M. E. Ritchie *et al.*, limma powers differential expression analyses for RNA-sequencing and microarray studies. *Nucleic Acids Res* **43**, e47 (2015).
7. A. Liberzon *et al.*, The Molecular Signatures Database (MSigDB) hallmark gene set collection. *Cell Syst* **1**, 417-425 (2015).
8. A. D. Rouillard *et al.*, The harmonizome: a collection of processed datasets gathered to serve and mine knowledge about genes and proteins. *Database (Oxford)* **2016**, (2016).
